# Supplementary material for: A novel compact MSAP reagent for one-step dual-modality probe construction via CBT/1,2-aminothiol click reaction
Source: Royal Society of Chemistry journal article supplement (doi:10.1039/d5nj03548a), 2025-12-16
Supplement: d5nj03548a1.pdf [file d5nj03548a1.pdf]

## A Novel Compact MSAP Reagent for One-Step Dual-Modality Probe Construction via CBT/1,2 Amino-thiol Click Reaction

Wei-Chieh Kuo<sup>a</sup>, Amber Piet<sup>b,c</sup>, Ya Ting Hsieh<sup>a</sup>, Karthik Kalidass<sup>a</sup>, Li Wei Zheng<sup>a</sup>,  
Yun Han Shih<sup>a</sup>, Yann Seimille<sup>b,c\*</sup>, Kuo-Ting Chen<sup>a\*</sup>

<sup>a</sup> Department of Chemistry, National Dong Hwa University, Hualien 974301, Taiwan.

<sup>b</sup> Department of Radiology and Nuclear Medicine, University Medical Center Rotterdam, Erasmus MC, Rotterdam, The Netherlands.

<sup>c</sup> Erasmus Medical Center Cancer Institute, Rotterdam, The Netherlands

\*Corresponding author: [ktchen26@gms.ndhu.edu.tw](mailto:ktchen26@gms.ndhu.edu.tw); [y.seimille@erasmusmc.nl](mailto:y.seimille@erasmusmc.nl)

| Contents       |                                                                                                                                        | Page       |
|----------------|----------------------------------------------------------------------------------------------------------------------------------------|------------|
| <b>Schemes</b> |                                                                                                                                        |            |
|                | Scheme S1. Synthesis of <b>S1</b>                                                                                                      | <b>S1</b>  |
|                | Scheme S2. Synthesis of <b>6</b> from <b>5</b> .                                                                                       | <b>S1</b>  |
|                | Scheme S3. Synthesis of <b>7</b> using <b>PSMA S3</b> .                                                                                | <b>S1</b>  |
| <b>Figures</b> |                                                                                                                                        |            |
|                | Figure S1. HPLC monitoring of synthesis of <b>7</b> from MSAP <b>6</b> and PSMA <b>S2</b> through a CBT/1,2-aminothiol click reaction. | <b>S2</b>  |
|                | Figure S2. Determination of the purity of compound <b>6</b> and <b>7</b>                                                               | <b>S3</b>  |
|                | Figure S3. Stability of [ <sup>111</sup> In] <b>In-7</b> in PBS.                                                                       | <b>S4</b>  |
|                | Figure S4. Stability of [ <sup>111</sup> In] <b>In-7</b> in Mouse Serum.                                                               | <b>S4</b>  |
|                | Figure S5. <sup>1</sup> H NMR spectrum of compound <b>2</b> (400 MHz, CD <sub>3</sub> OD)                                              | <b>S5</b>  |
|                | Figure S6. <sup>13</sup> C NMR spectrum of compound <b>2</b> (100 MHz, CD <sub>3</sub> OD)                                             | <b>S5</b>  |
|                | Figure S7. <sup>1</sup> H NMR spectrum of compound <b>3</b> (400 MHz, CD <sub>3</sub> OD)                                              | <b>S6</b>  |
|                | Figure S8. <sup>13</sup> C NMR spectrum of compound <b>3</b> (100 MHz, CD <sub>3</sub> OD)                                             | <b>S6</b>  |
|                | Figure S9. <sup>1</sup> H NMR spectrum of compound <b>5</b> (400 MHz, CD <sub>3</sub> OD)                                              | <b>S7</b>  |
|                | Figure S10. <sup>13</sup> C NMR spectrum of compound <b>5</b> (100 MHz, CD <sub>3</sub> OD)                                            | <b>S7</b>  |
|                | Figure S11. <sup>1</sup> H NMR spectrum of compound <b>6</b> (400 MHz, CD <sub>3</sub> OD)                                             | <b>S8</b>  |
|                | Figure S12. LC-MS spectrum of compound <b>2</b>                                                                                        | <b>S9</b>  |
|                | Figure S13. LC-MS spectrum of compound <b>3</b>                                                                                        | <b>S9</b>  |
|                | Figure S14. LC-MS spectrum of compound <b>5</b>                                                                                        | <b>S9</b>  |
|                | Figure S15. LC-MS spectrum of compound <b>6</b>                                                                                        | <b>S9</b>  |
|                | Figure S16. LC-MS spectrum of compound <b>7</b>                                                                                        | <b>S10</b> |
|                | Figure S17. LC-MS spectrum of compound [ <sup>nat</sup> Ga] <b>Ga-6</b> .                                                              | <b>S10</b> |

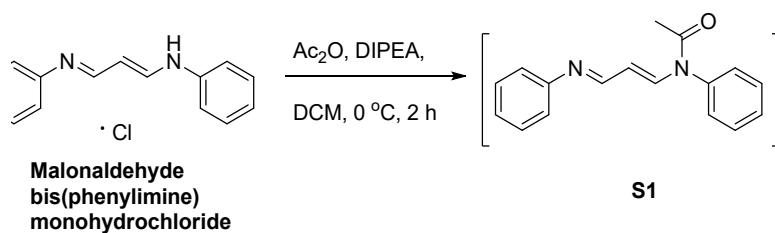

Scheme S1. Synthesis of **S1**.

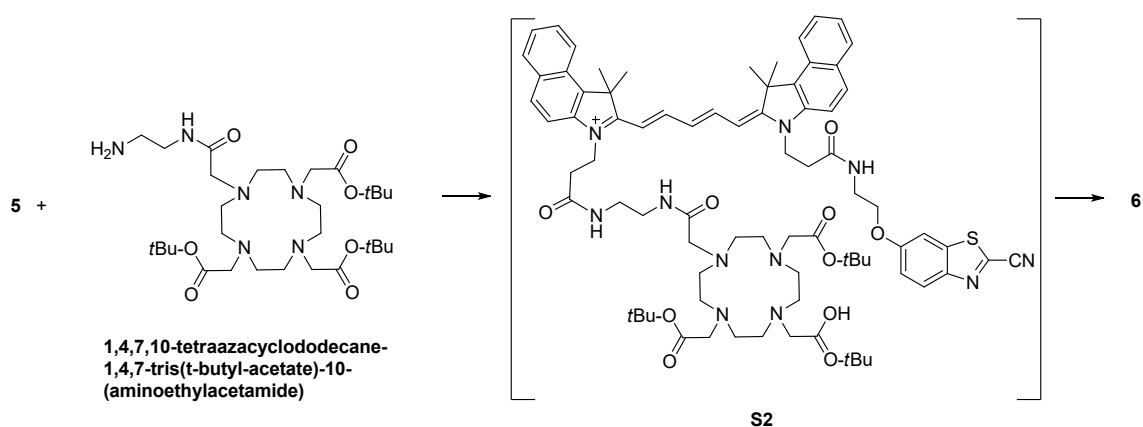

Scheme S2. Synthesis of **6** from **5** through intermediate **S2**.

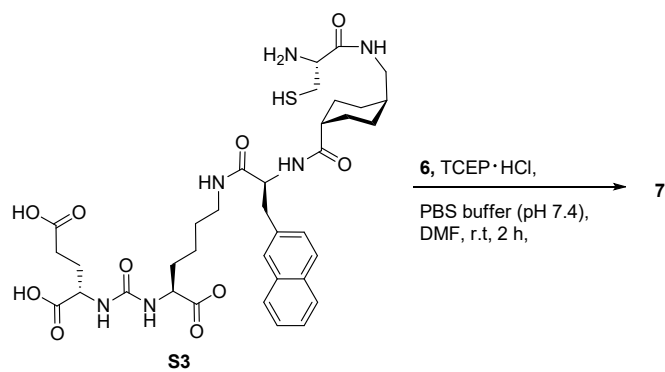

Scheme S3. Synthesis of **7** using PSMA **S3**.

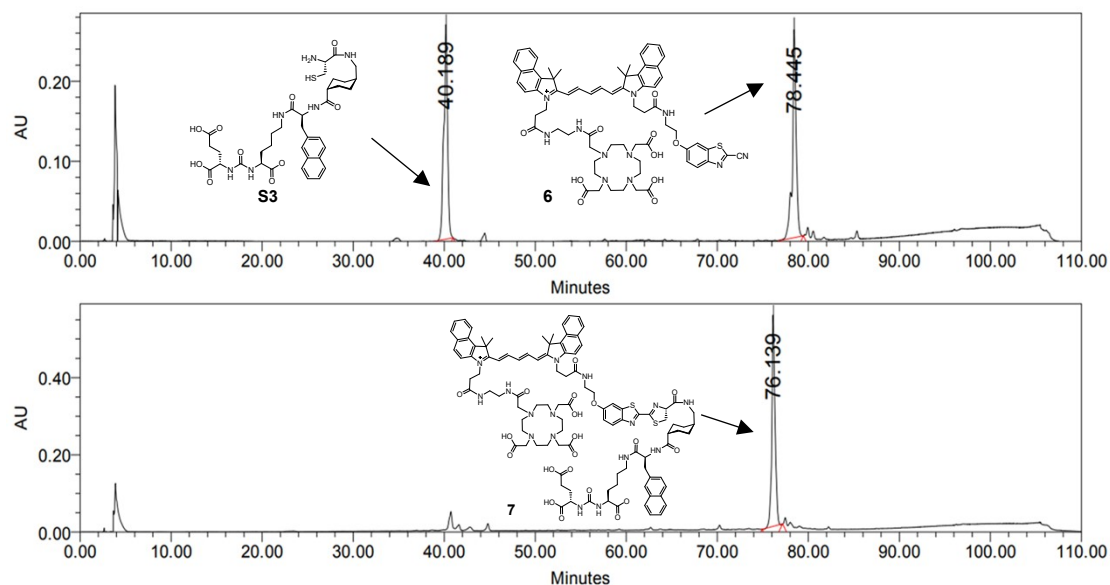

**Figure S1.** HPLC monitoring of synthesis of **7** from MSAP **6** and PSMA **S3** through a CBT/1,2-aminothiol click reaction. The monitoring tests were performed on by HPLC on a semi-preparative RP-C18 column (Phenomenex, Aqua®, 5  $\mu\text{m}$ , 10.0  $\times$  250 mm) with a gradient elution of acetonitrile (ACN; 10% to 100% in  $\text{H}_2\text{O}$ , containing 0.1 % TFA) at a flow rate of 3  $\text{mL} \cdot \text{min}^{-1}$  over 110 min. The upper and the lower HPLC spectra were collected at 0 h and 2 h, respectively. The retention time of **S3**, **6** and **7** were 40.18, 78.44, 76.13 min, respectively.

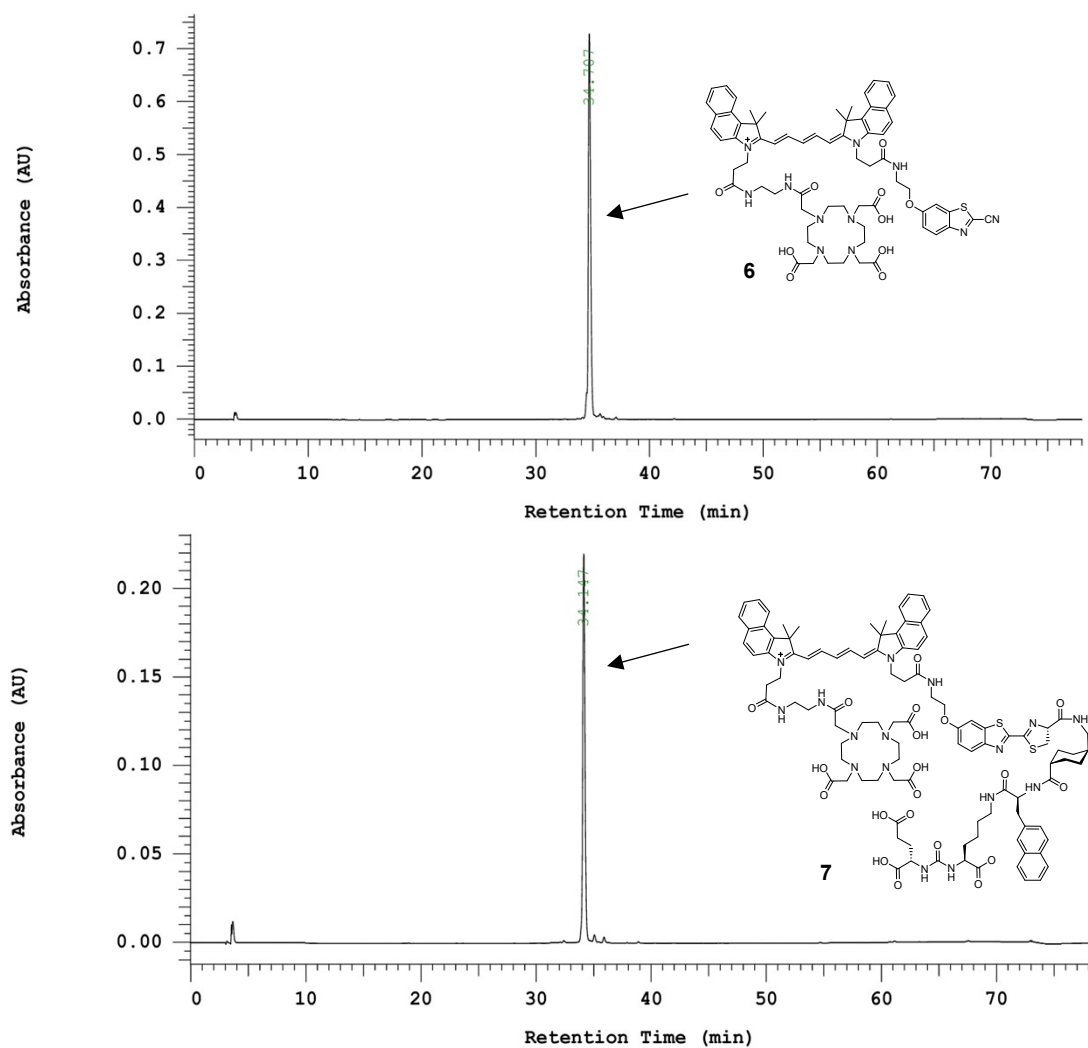

**Figure S2.** Determination of the purity of compound **6** and **7**. The purity of **6** and **7** were determined on an analytical RP-C18 HPLC (Phenomenex Luna®, 5  $\mu$ m, 4.6  $\times$  250 mm) using a gradient elution of acetonitrile (ACN; 10% to 100% in H<sub>2</sub>O, containing 0.1 % TFA) at a flow rate of 1 mL $\cdot$ min<sup>-1</sup> over 78 min. The retention time of **6** and **7** was 34.7 and 34.1min, respectively. The purity of both compounds were estimated to be greater than 95% based on absorption at 310 nm.

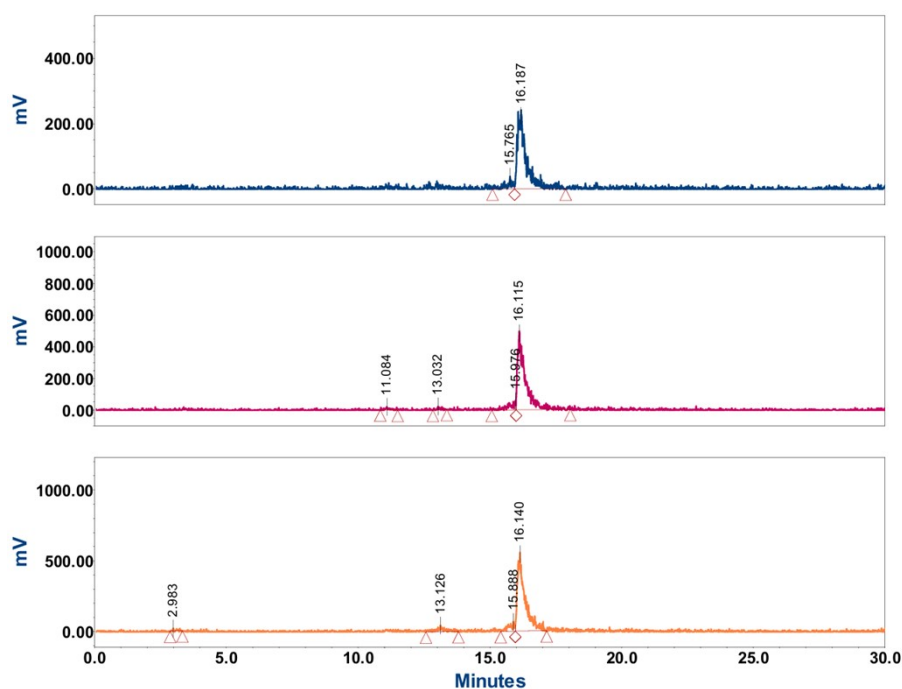

**Figure S3.** Stability of  $[^{111}\text{In}]\text{In-7}$  in PBS. Radio-HPLC chromatograms of  $[^{111}\text{In}]\text{In-7}$  following incubation in PBS for 1 h (blue; RCP = 92.1%), 4 h (pink; RCP = 88.1%), and 24 h (orange, RCP = 85.6%).

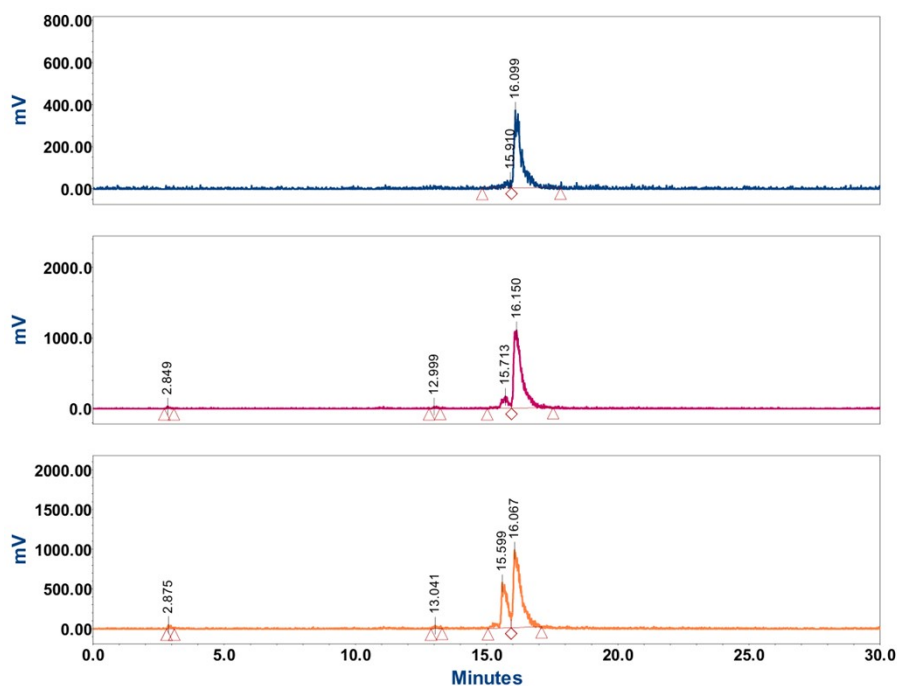

**Figure S4.** Stability of  $[^{111}\text{In}]\text{In-7}$  in mouse serum. Radio-HPLC chromatograms of  $[^{111}\text{In}]\text{In-7}$  following incubation in mouse serum for 1 h (blue; RCP = 92.9%), 4 h (pink; RCP = 87.7%), and 24 h (orange; RCP = 66.8%).

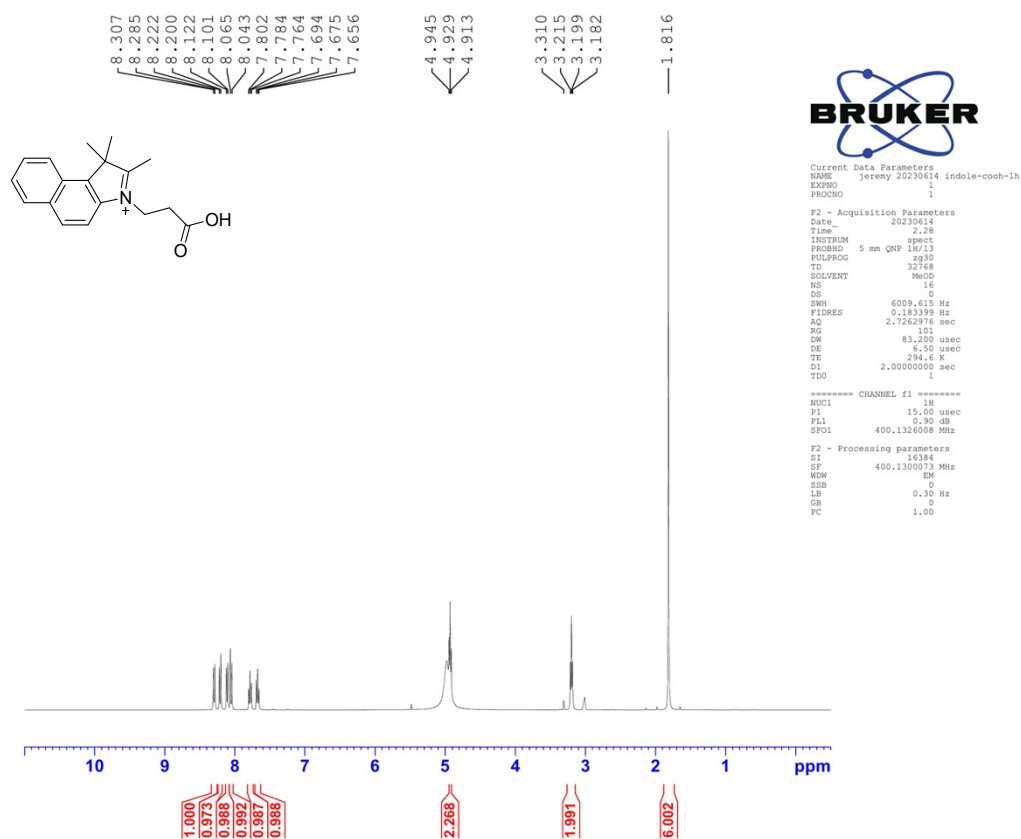

Figure S5. <sup>1</sup>H NMR spectrum of compound 2 (400 MHz, CD<sub>3</sub>OD)

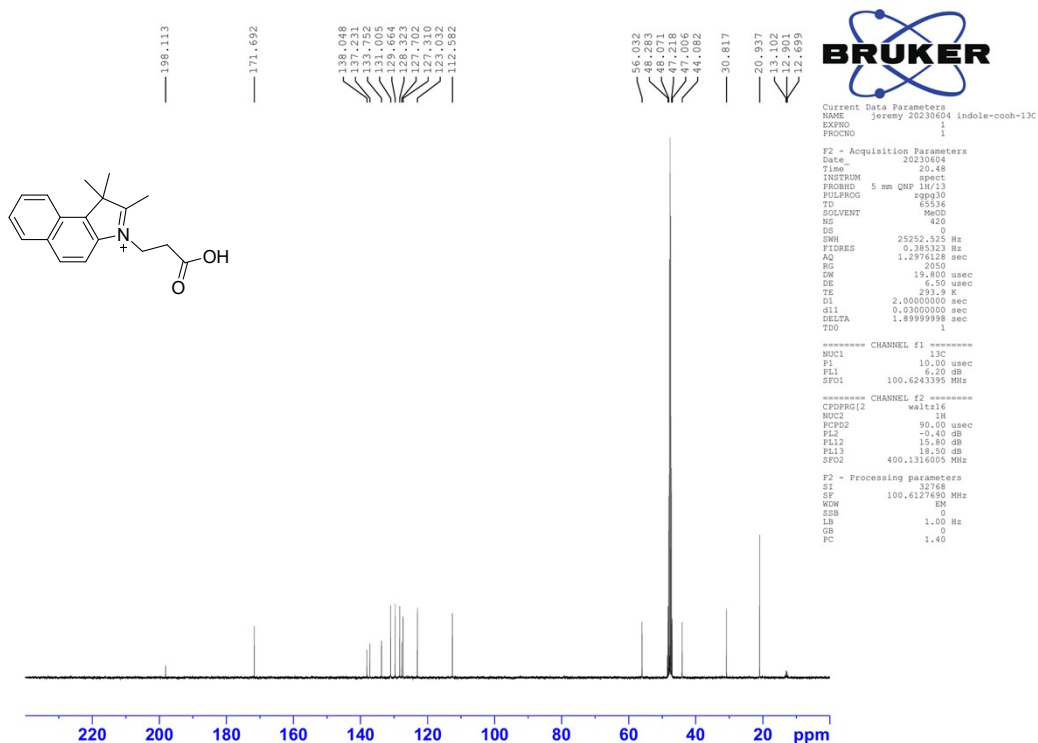

Figure S6. <sup>13</sup>C NMR spectrum of compound 2 (100 MHz, CD<sub>3</sub>OD)









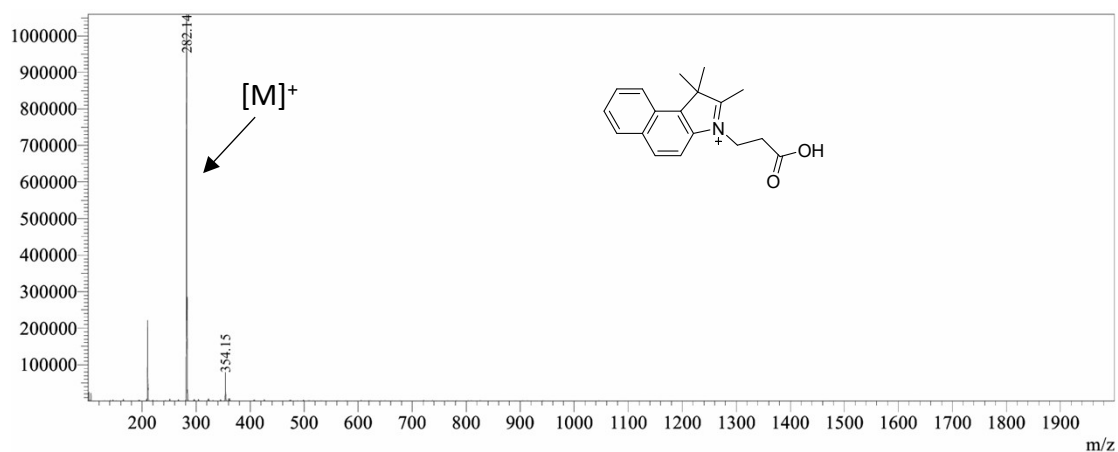

Figure S12. LC-MS spectrum of compound **2**.

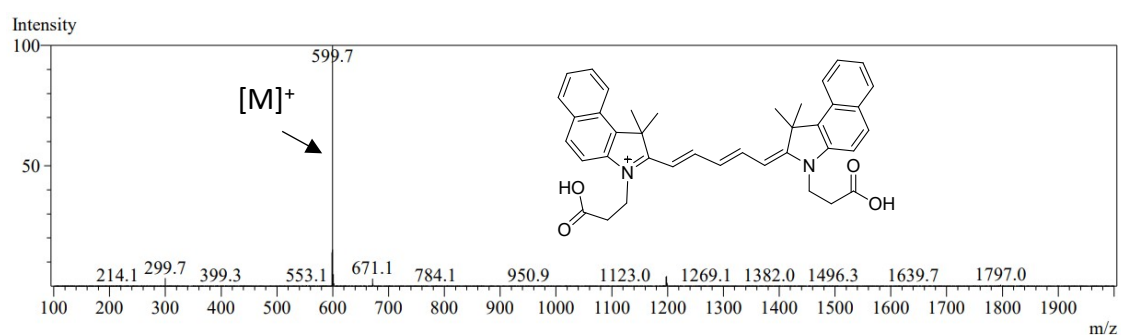

Figure S13. LC-MS spectrum of compound **3**.

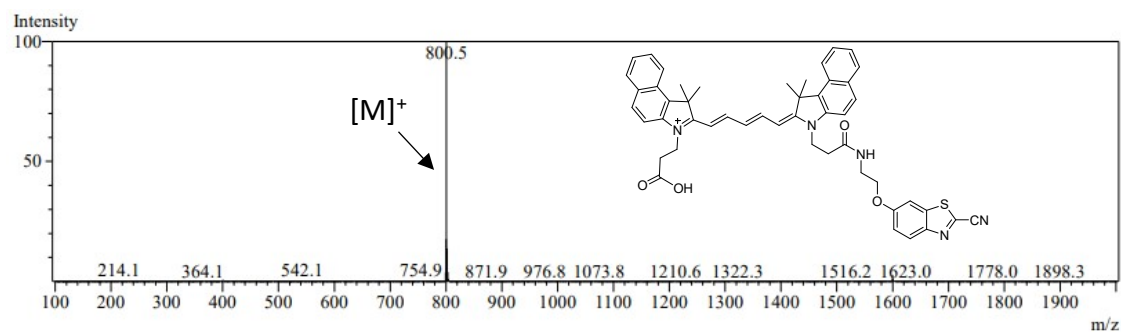

Figure S14. LC-MS spectrum of compound **5**.

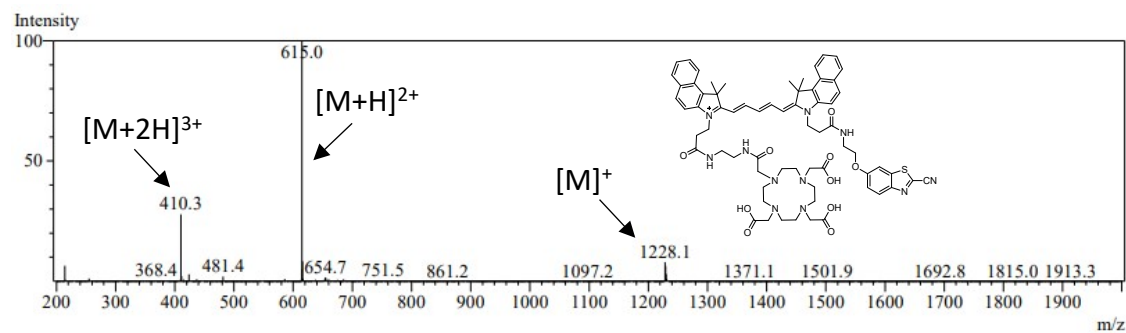

Figure S15. LC-MS spectrum of compound **6**.

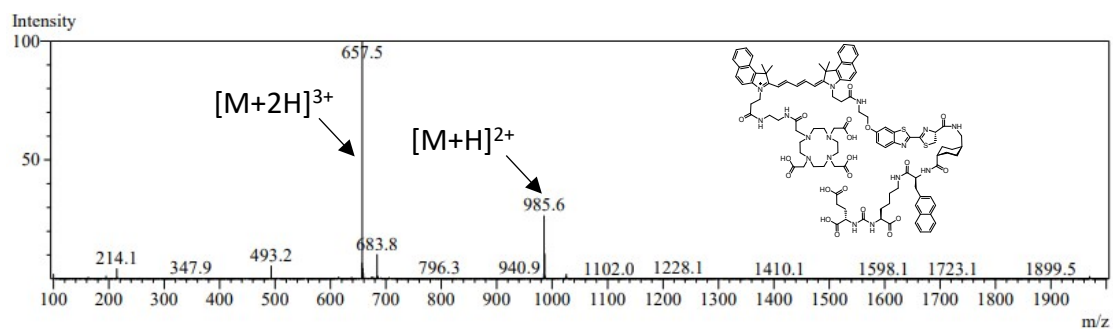

Figure S16. LC-MS spectrum of compound 7.

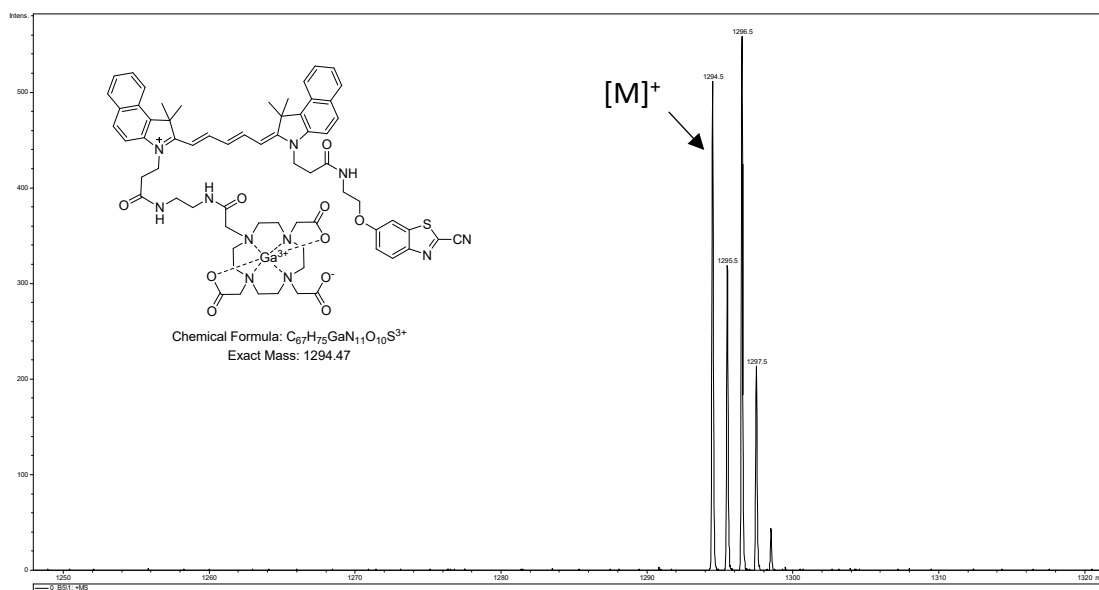

Figure S17. LC-MS spectrum of compound [natGa]Ga-6.

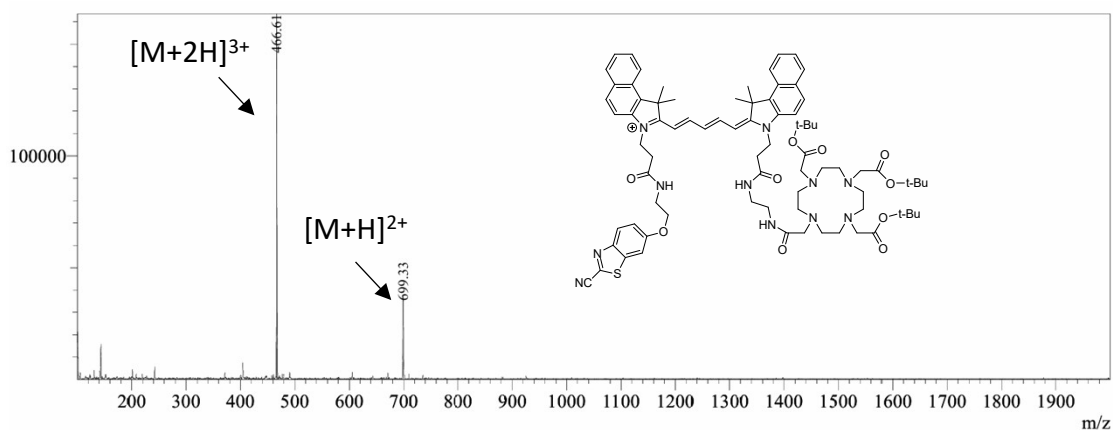

Figure S18. LC-MS spectrum of compound S2.
